# Supplementary material for: A free-standing, self-healing multi-stimuli responsive gel showing cryogenic magnetic cooling
Source: Royal Society of Chemistry journal article supplement (doi:10.1039/d0dt02356f), 2020-01-01
Supplement: d0dt02356f1.pdf [file d0dt02356f1.pdf]

## Supporting Information

# A Free-Standing, Self-Healing Multi Stimuli Responsive Gel Showing Cryogenic Magnetic Cooling

---

Amit Adhikary<sup>†</sup>, Krishna Sundar Das<sup>†</sup>, Sayan Saha, Manasi Roy and Raju Mondal\*

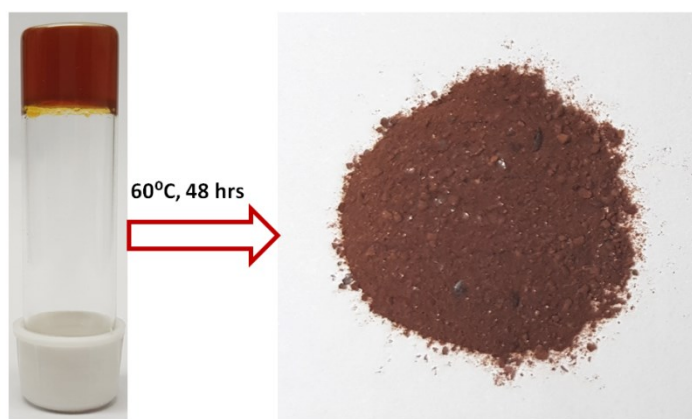

**Fig. S1** Preparation of xerogel.

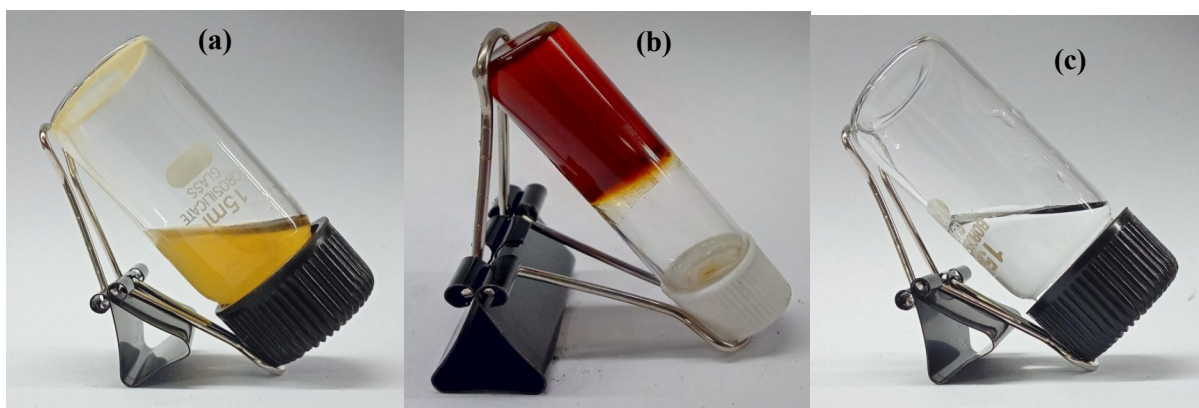

**Fig. S2** (a) Solution of the reaction of anhy.  $\text{FeCl}_3$  salt with  $\text{H}_2\text{Pic}$  in 1.5 : 1 molar ratio; (b) Solution of the reaction of anhy.  $\text{FeCl}_3$  salt with  $\text{H}_2\text{Pic}$  in 3 : 1 molar ratio (c) solution of only ligand.

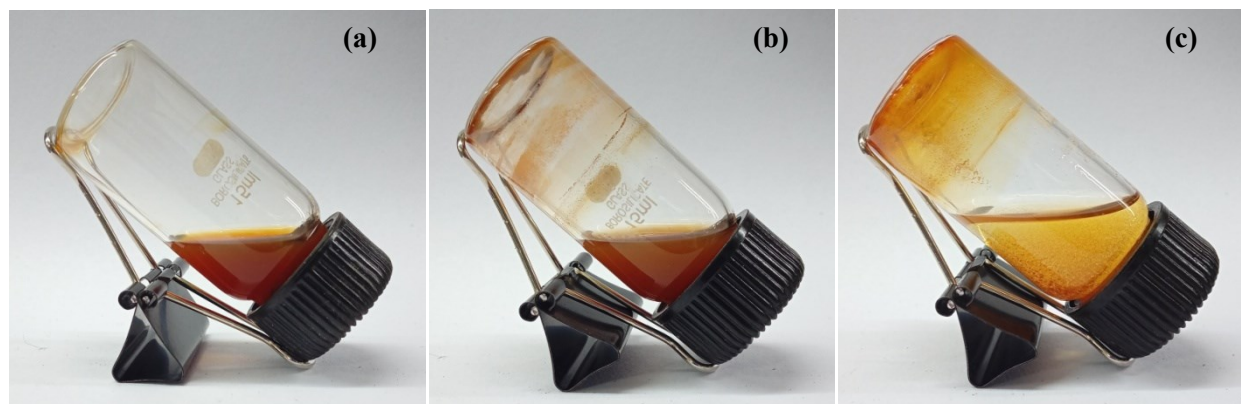

**Fig. S3** (a) Solution of the reaction of  $\text{Fe}(\text{NO}_3)_3 \cdot 9\text{H}_2\text{O}$  and  $\text{H}_2\text{L}$ ; (b) Solution of the reaction of  $\text{FeSO}_4$  and  $\text{H}_2\text{L}$ ; (c) Solution of the reaction of  $\text{Fe}(\text{ClO}_4)_3 \cdot 6\text{H}_2\text{O}$  and  $\text{H}_2\text{L}$ .

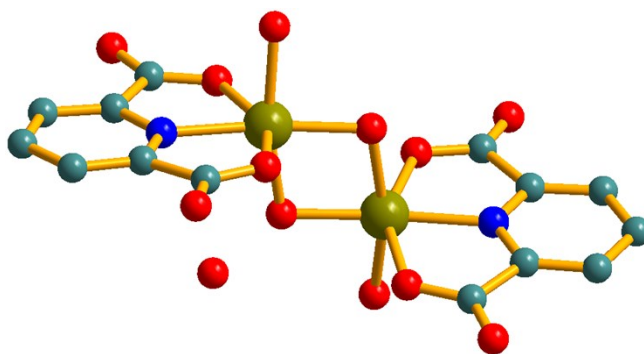

**Fig. S4** (a) Molecular structure of  $[\text{Dipic}(\text{H}_2\text{O})\text{FeOH}]_2 \cdot \text{H}_2\text{O}$ .

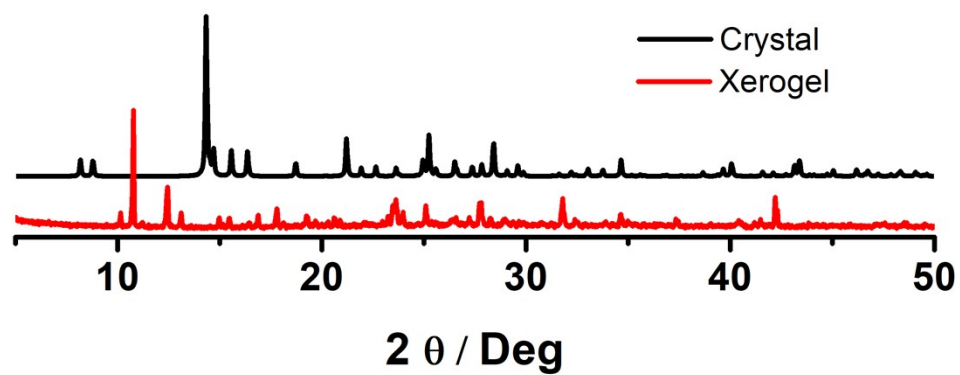

**Fig. S5** PXRD pattern of xerogel from freshly prepared gel and the crystal of  $[\text{Dipic}(\text{H}_2\text{O})\text{FeOH}]_2 \cdot \text{H}_2\text{O}$ .

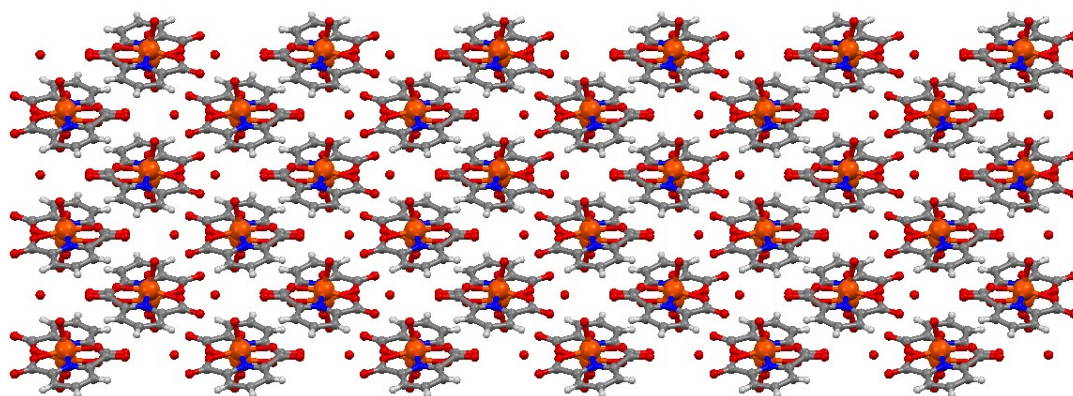

**Fig. S6** Packing diagram of [Dipic(H<sub>2</sub>O)FeOH]<sub>2</sub>·H<sub>2</sub>O along a-axis.

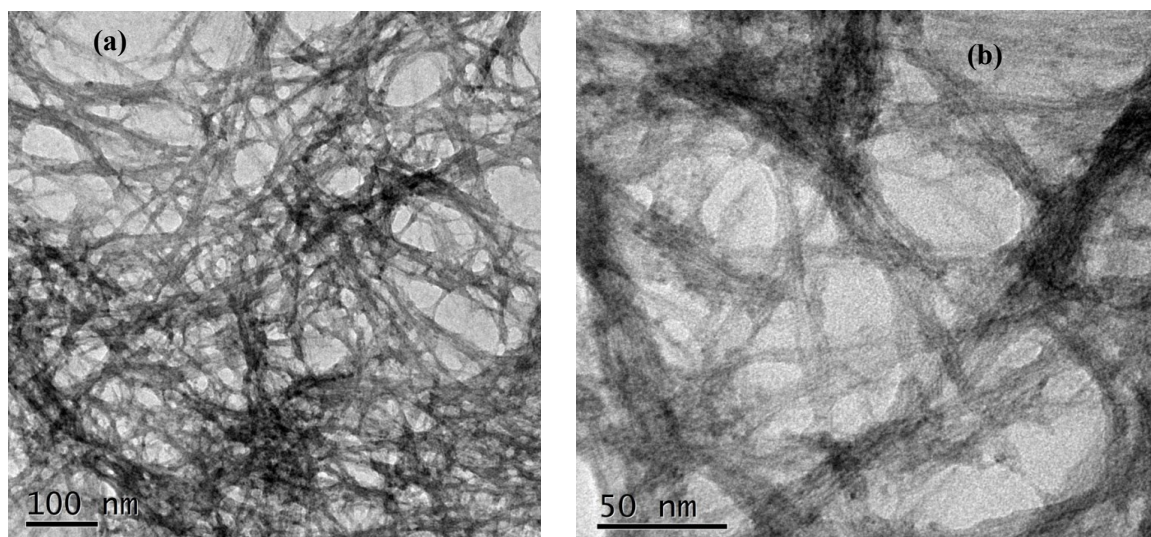

**Fig. S7** TEM images showing (a) fibrous morphology, (b) HR image of freshly prepared gel.

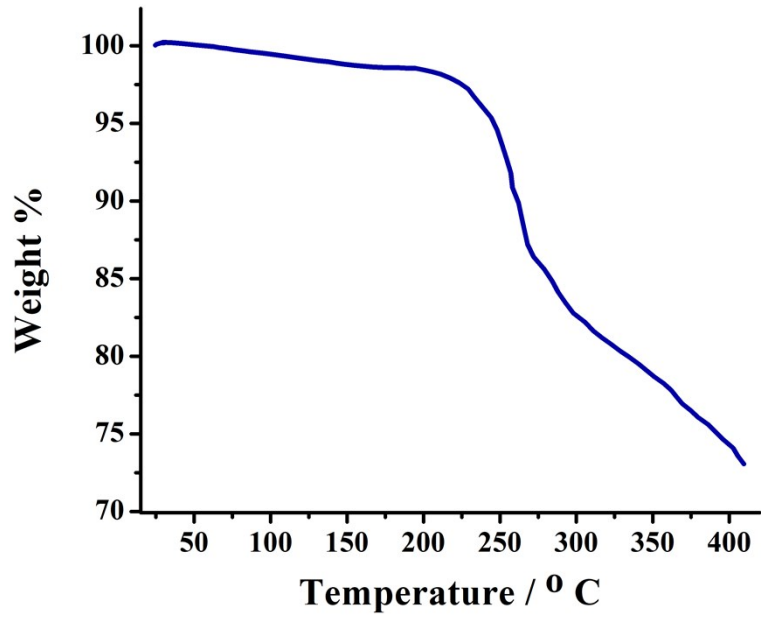

Fig. S8 TG analysis of the freshly prepared xerogel.

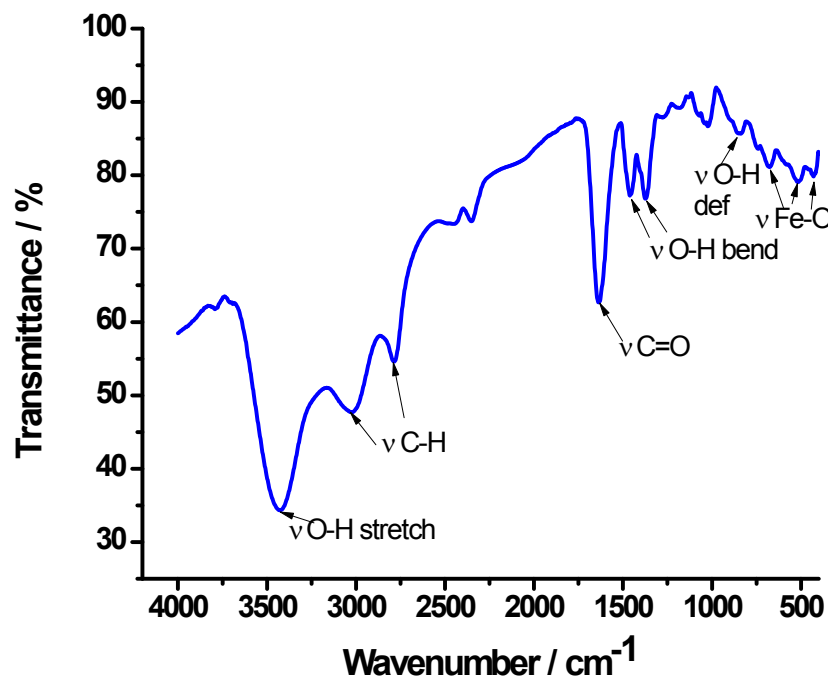

Fig. S9 FT-IR plot of as synthesized gel.

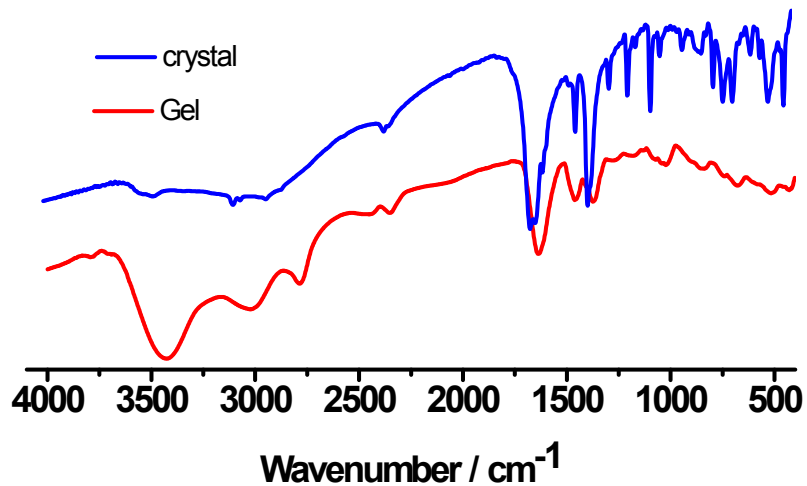

**Fig. S10** Comparison of FT-IR plots of as synthesized gel and crystalline material of  $[\text{Dipic}(\text{H}_2\text{O})\text{FeOH}]_2 \cdot \text{H}_2\text{O}$ .

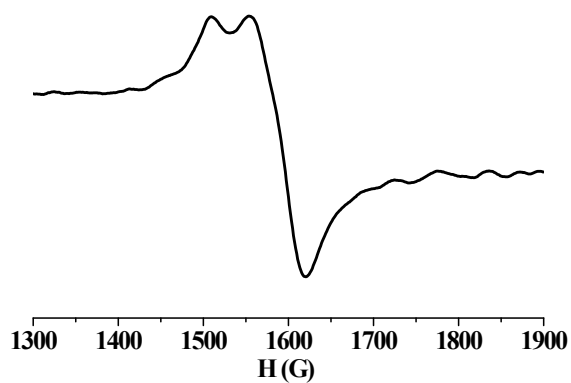

**Fig. S11** EPR spectrum of as synthesized gel.

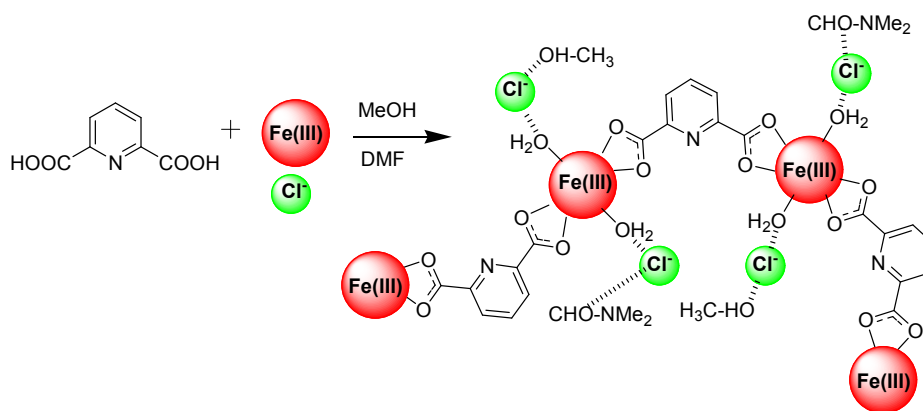

**Fig. S12** Probable self-assembly of the formation of synthesized gel.

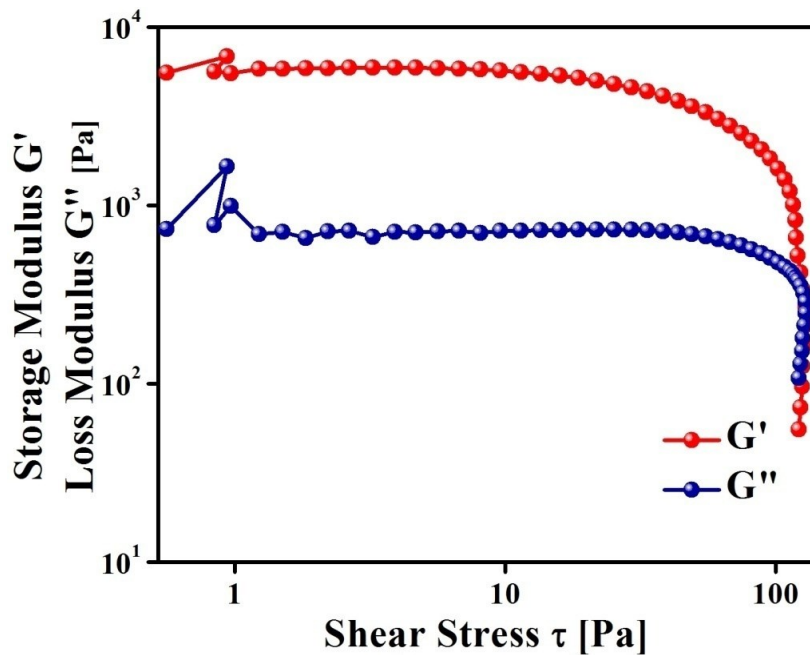

Fig. S13 Stress sweep experiment of the gel.

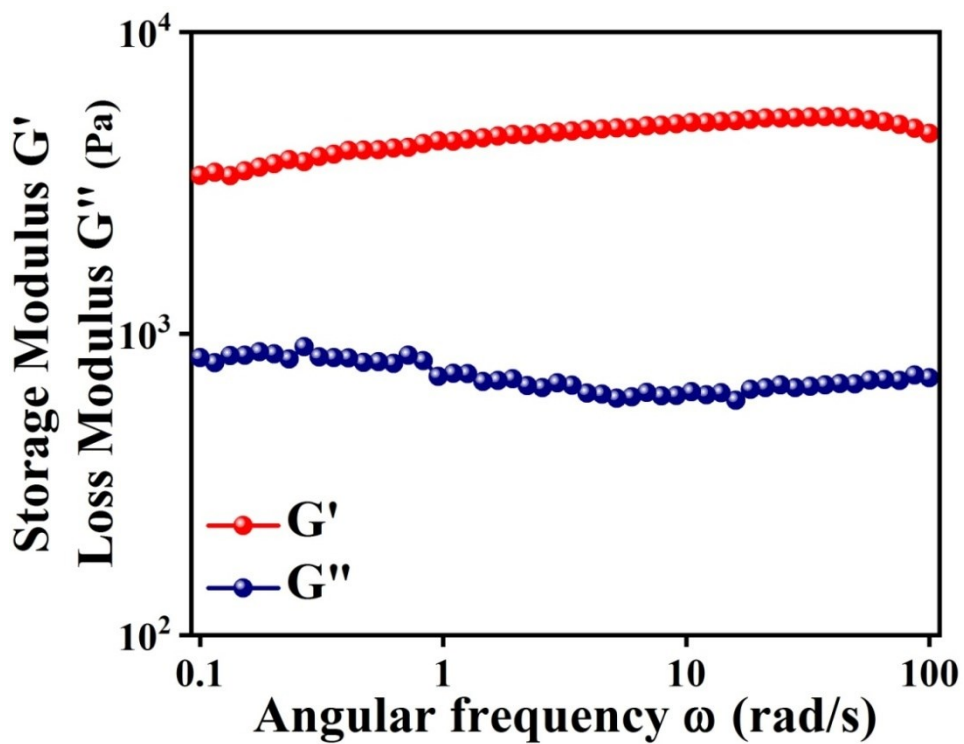

Fig. S14 Frequency sweep experiment of the gel.

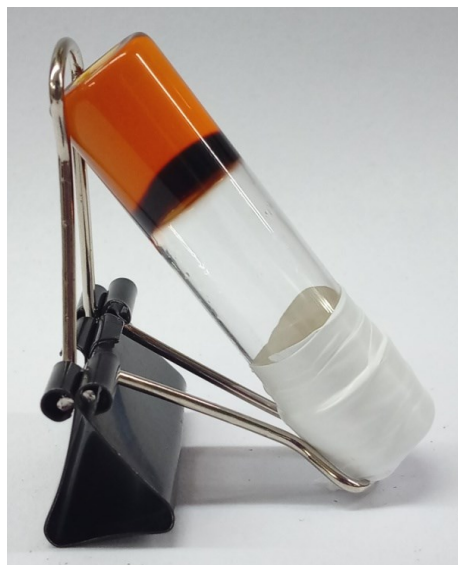

**Fig. S15** Reduction of Fe(III) to Fe(II) of metallogel by ascorbic acid.

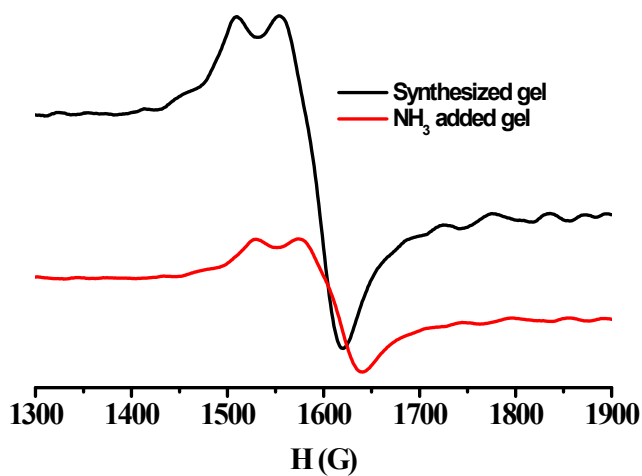

**Fig. S16** Comparison of EPR spectra of as synthesized gel and the gel after addition of  $\text{NH}_3$ .

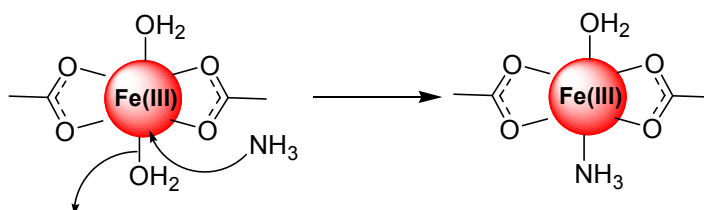

**Fig. S17** Probable change in geometry around Fe(III) during  $\text{NH}_3$  sensing.

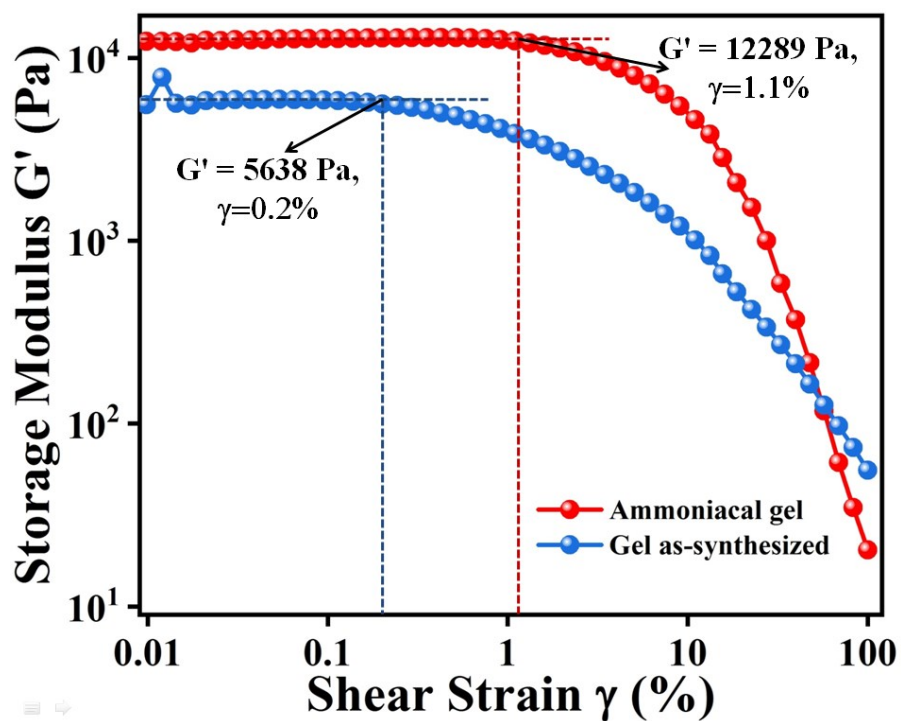

Fig. S18 Comparison of strength between ammoniacal gel and gel as-synthesized.

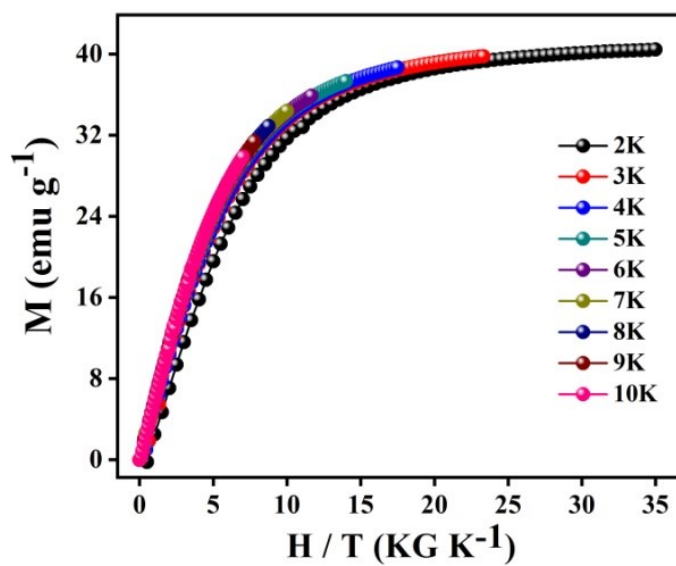

Fig. S19 Isothermal normalized magnetizations vs. field/temperature plot of the xerogel.



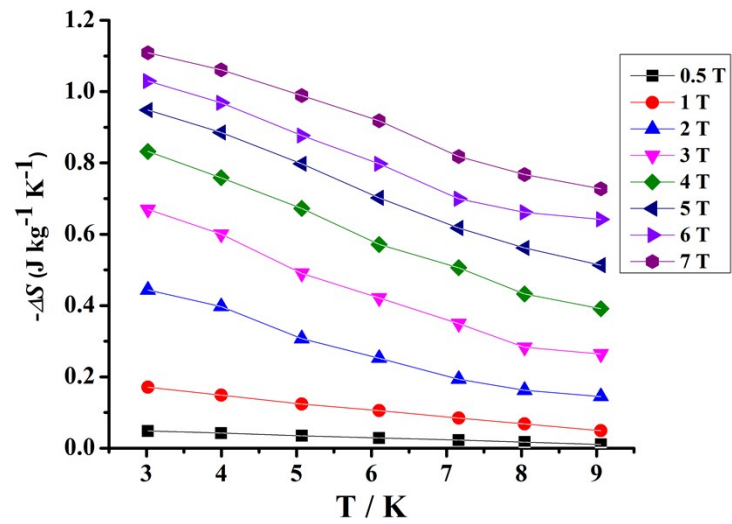

**Fig. S20** Magnetic entropy changes of the  $[\text{Dipic}(\text{H}_2\text{O})\text{FeOH}]_2 \cdot \text{H}_2\text{O}$ .
